# Supplementary material for: Hydrothermal route to metastable phase FeVO4ultrathin nanosheets with exposed {010} facets: synthesis, photocatalysis and gas-sensing
Source: Royal Society of Chemistry journal article supplement (doi:10.1039/c3ce41692e), 2013-10-15
Supplement: c3ce41692e.pdf [file c3ce41692e.pdf]

## Supporting information

### Hydrothermal route to metastable phase FeVO<sub>4</sub> ultrathin nanosheets with exposed {010} facets: synthesis, photocatalysis and gas-sensing

Yi Zhao, Kai Yao, Qian Cai, Zhijie Shi, Minqi Sheng\*, Haiyang Lin, Mingwang Shao\*

Institute of Functional Nano & Soft Materials (FUNSOM), Jiangsu Key Laboratory for Carbon-based Functional Materials and Devices, Soochow University, Suzhou 215123, P. R. China

Figure S1 displays the XRD pattern of the as-prepared FeVO<sub>4</sub>-I. All the diffraction peaks may be readily indexed as a triclinic phase of FeVO<sub>4</sub>-I (JCPDS 38-1372). No peaks from other phases have been detected. The sharp and narrow diffraction peaks reveal high crystallization of the as-prepared products.

Figure S2 is the thickness dispersion of the FeVO<sub>4</sub>-II nanosheets.

Figure S3 is the XRD pattern of the sample with hexagonal nanosheet morphology obtained at pH of 12, which were identified as Fe<sub>1.833</sub>(OH)<sub>0.5</sub>O<sub>0.5</sub>. All the diffraction peaks may be readily indexed as a hexagonal Fe<sub>1.833</sub>(OH)<sub>0.5</sub>O<sub>0.5</sub> (JCPDS 76-0182).

Figure S4 is the UV-Vis diffuse reflectance spectroscopy of FeVO<sub>4</sub>-II and FeVO<sub>4</sub>-I photocatalysts.

Figure S5 shows the plots of absorption squared ( $abs^2$ ) versus energy and the square root of absorption ( $abs^{1/2}$ ) versus energy for the FeVO<sub>4</sub>-II absorption edge region. For semiconductors, the square of absorption coefficient is linear with respect to energy for direct optical transitions in the absorption edge region, whereas the

square root of absorption coefficient is linear with energy for indirect transition. The  $\text{abs}^2$  versus energy plot is nearly linear, while the  $\text{abs}^{1/2}$  versus energy deviates from the fitted straight line, which suggests that the absorption edge of  $\text{FeVO}_4\text{-II}$  is caused by direct transitions and its band gap can be determined as 2.0 eV.

The flat-band potential of  $\text{FeVO}_4\text{-II}$  was calculated employing an atom's Mulliken electronegativity theory [S1]:  $E_{\text{VB}} = X_{\text{FeVO}_4\text{-II}} - E^e + (1/2)E_g$ , where  $E_{\text{VB}}$  is the potential of valance band top,  $X_{\text{FeVO}_4\text{-II}}$  is the electronegativity of the constituent atoms,  $E^e$  is the energy of free electrons on the hydrogen scale (ca. 4.5 eV) and  $E_g$  is the band gap energy of the  $\text{FeVO}_4\text{-II}$  (2.0 eV). Figure S6 shows a schematic band structure of  $\text{FeVO}_4\text{-II}$  semiconductor based on the earlier calculation. It is theoretically speculated that the band edge potentials of CB and VB of  $\text{FeVO}_4\text{-II}$  are 0.77 and 2.77 eV with respect to the vacuum level, respectively.

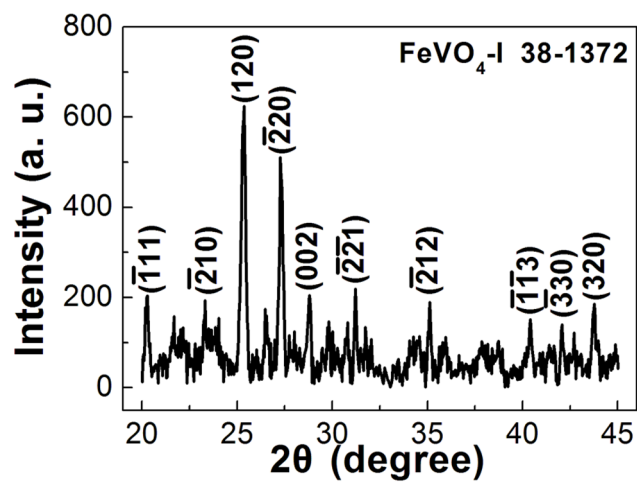

Fig. S1. (a) XRD pattern of the as-prepared products showing triclinic phase of FeVO<sub>4</sub>-I.

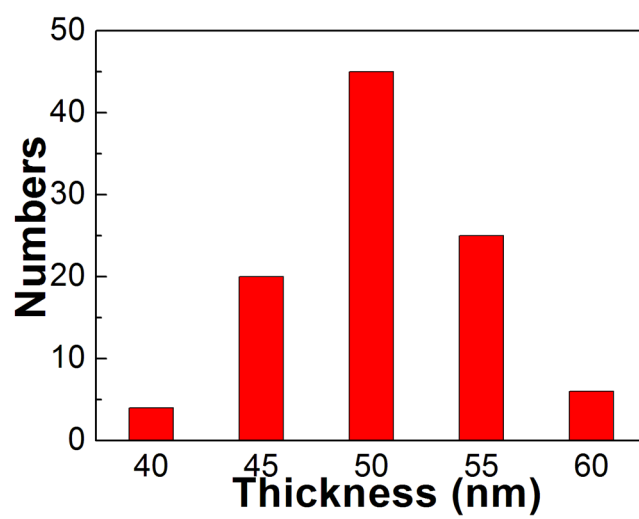

Fig. S2. The thickness dispersion of the FeVO<sub>4</sub>-II nanosheets.

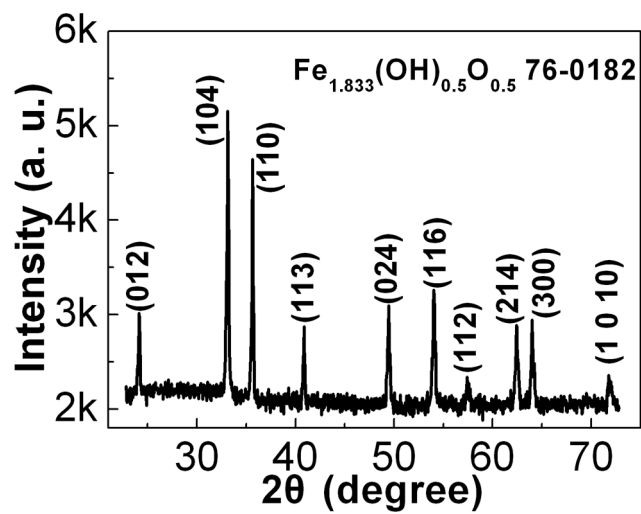

Fig. S3. XRD pattern of the products showing hexagonal  $\text{Fe}_{1.833}(\text{OH})_{0.5}\text{O}_{0.5}$  at pH 12.

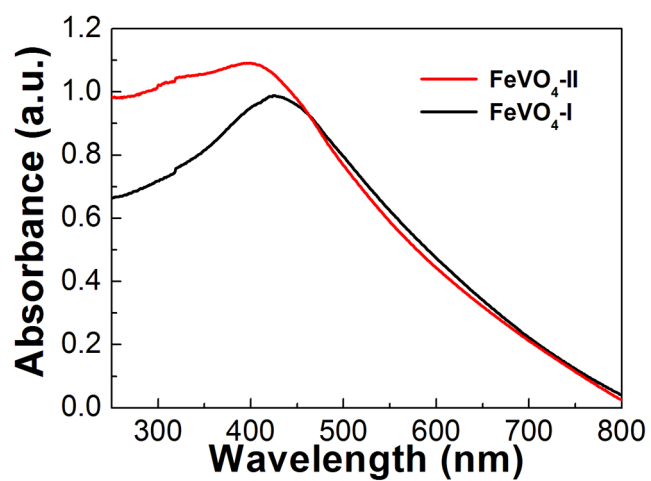

Fig. S4. UV-Vis diffuse reflectance spectroscopy of FeVO<sub>4</sub>-II and FeVO<sub>4</sub>-I photocatalysts.

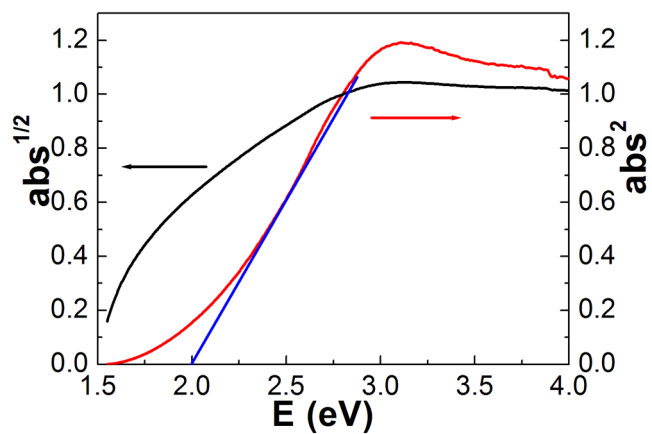

Fig. S5. The plots of absorption squared ( $\text{abs}^2$ ) and the square root of absorption ( $\text{abs}^{1/2}$ ) versus energy for the  $\text{FeVO}_4\text{-II}$  absorption in the absorption edge region of  $\text{FeVO}_4\text{-II}$  sample.

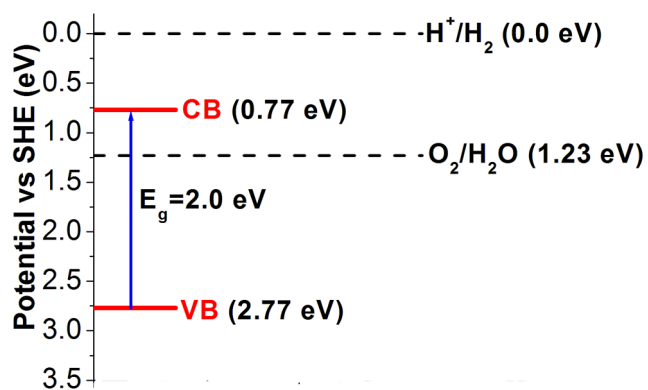

Fig. S6. Schematic band structure of FeVO<sub>4</sub>-II.

[S1] Z. Jiang, F. Yang, G. D. Yang, L. Kong, M. O. Jones, T. C. Xiao, P. P. Edwards, *Journal of Photochemistry and Photobiology A: Chemistry*, 2010, 212, 8-13.
